# Supplementary material for: Total phosphorus determination in eutrophic tropical river sediments by laser-induced breakdown spectroscopy techniques
Source: Royal Society of Chemistry journal article supplement (doi:10.1039/d0ay02008g), 2020-12-10
Supplement: d0ay02008g1.pdf [file d0ay02008g1.pdf]

1 Electronic supplementary information

2

3 **Total phosphorus determination in Eutrophic Tropical River Sediments**  
4 **by Laser-Induced Breakdown Spectroscopy techniques**

5

6 Carla Pereira de Moraes, <sup>a</sup> Gustavo Nicolodelli, <sup>b</sup> Milene Corso Mitsuyuki, <sup>c</sup> Kleydson  
7 Stênio Gaioso da Silva, <sup>c</sup> Frederico Fábio Mauad, <sup>d</sup> Stéphane Mounier <sup>e</sup> and Débora  
8 Marcondes Bastos Pereira Milori <sup>\*c</sup>

9

10 <sup>a</sup>. São Carlos Institute of Chemistry, University of São Paulo, São Carlos, SP, Brazil.

11 <sup>b</sup>. Department of Physics, Federal University of Santa Catarina, Florianópolis, SC, Brazil.

12 <sup>c</sup>. Embrapa Instrumentation, São Carlos, SP, Brazil.

13 <sup>d</sup>. São Carlos School of Engineering, University of São Paulo, São Carlos, SP, Brazil.

14 <sup>e</sup>. University of Toulon, Aix Marseille University, CNRS/INSU, IRD, MIO UM 110,

15 Mediterranean Institute of Oceanography, CS 60584, 83041, Toulon, Cedex 9, France.

16

17 *\*Corresponding author*

18 ORCID ID: <https://orcid.org/0000-0003-1253-7174>

19 \*E-mail: [debora.milori@embrapa.br](mailto:debora.milori@embrapa.br)

20 Phone: +55 16 2107-2801

21

22

23

24

25

26

27

28

29

30 .

31 **Experimental section:**

32 **Table S1.** Geographic coordinates of collection points.

| Collection points | Tributary         | Geographic coordinates |              |
|-------------------|-------------------|------------------------|--------------|
| Station 1         | Piracicaba river  | 22°35'55.5"S           | 48°13'02.8"W |
| Station 2         | Piracicaba river  | 22°35'36.9"S           | 48°16'00.0"W |
| Station 3         | Piracicaba river  | 22°36'01.8"S           | 48°17'53.5"W |
| Station 4         | Confluence region | 22°37'51.6"S           | 48°20'29.2"W |
| Station 5         | Tietê river       | 22°39'58.2"S           | 48°21'49.4"W |
| Station 6         | Tietê river       | 22°40'11.0"S           | 48°19'26.4"W |
| Station 7         | Tietê river       | 22°40'24.7"S           | 48°15'05.3"W |

33

34 **Table S2:** Depth of each sedimentary core.

| Depth (cm) |           |           |           |           |           |           |
|------------|-----------|-----------|-----------|-----------|-----------|-----------|
| Station 1  | Station 2 | Station 3 | Station 4 | Station 5 | Station 6 | Station 7 |
| 0 - 10     | 0 - 5     | 0 - 10    | 0 - 10    | 0 - 10    | 0 - 10    | 0 - 10    |
| 10 - 20    | 5 - 10    | 10 - 15   | 20 - 20   | 10 - 20   | 10 - 20   | 10 - 20   |
| 20 - 25    | 10 - 15   | 15 - 20   | 20 - 30   | 20 - 25   | 20 - 22   | 20 - 30   |
| 25 - 30    | 15 - 20   | 20 - 25   | 30 - 35   | 25 - 30   | 22 - 24   | 30 - 35   |
| 30 - 35    | 20 - 25   | 25 - 30   | 35 - 40   | 30 - 35   | 24 - 26   | 35 - 40   |
| 35 - 40    | 25 - 27   | 30 - 32   | 40 - 45   | 35 - 40   | 26 - 28   | 40 - 45   |
| 40 - 42    | 27 - 29   | 32 - 34   | 45 - 50   | 40 - 42   | 28 - 30   | 45 - 50   |
| 42 - 44    | 29 - 31   | 34 - 36   | 50 - 55   | 42 - 44   | 32 - 32   | 50 - 52   |
| 44 - 46    | 31 - 33   | 36 - 38   | 55 - 60   | 44 - 46   | 32 - 34   | 52 - 54   |
| 46 - 48    | 33 - 35   | -         | 60 - 62   | 46 - 48   | -         | 54 - 59   |
| -          | -         | -         | 62 - 67   | -         | -         | -         |

35

36

37

38

39
